# Supplementary material for: Association of Longitudinal Patterns of Habitual Sleep Duration With Risk of Cardiovascular Events and All-Cause Mortality
Source: PubMed Central journal article supplement (PMC7244989; doi:10.1001/jamanetworkopen.2020.5246), 2020-05-22
Supplement: jamanetwopen-3-e205246-s001.pdf [file jamanetwopen-3-e205246-s001.pdf]

## Supplementary Online Content

Wang Y-H, Wang J, Chen S-H, et al. Association of longitudinal patterns of habitual sleep duration with risk of cardiovascular events and all-cause mortality. *JAMA Netw Open*. 2020;3(5):e205246. doi:10.1001/jamanetworkopen.2020.5246

**eFigure 1.** Flowchart of Participant Inclusion

**eFigure 2.** Restricted Spline Curves for Associations Between Baseline (2010) Sleep Duration and All-Cause Mortality or Cardiovascular Events

**eTable 1.** Association Between Sleep Duration Trajectory Groups and First Cardiovascular Events, Stratified by Age, Sex, BMI, Hypertension, Diabetes, Hyperlipidemia, and Kidney Function

**eTable 2.** Association Between Sleep Duration Trajectory Groups and All-Cause Mortality, Stratified by Age, Sex, BMI, Hypertension, Diabetes, Hyperlipidemia, and Kidney Function

**eTable 3.** Association of Baseline (2010) Sleep Duration and First Cardiovascular Events or All-Cause Mortality

**eTable 4.** Association Between Cumulative Average Sleep Duration During 2006 to 2010 and First Cardiovascular Events or All-Cause Mortality

This supplementary material has been provided by the authors to give readers additional information about their work.

**eFigure 1. Flowchart of Participant Inclusion**

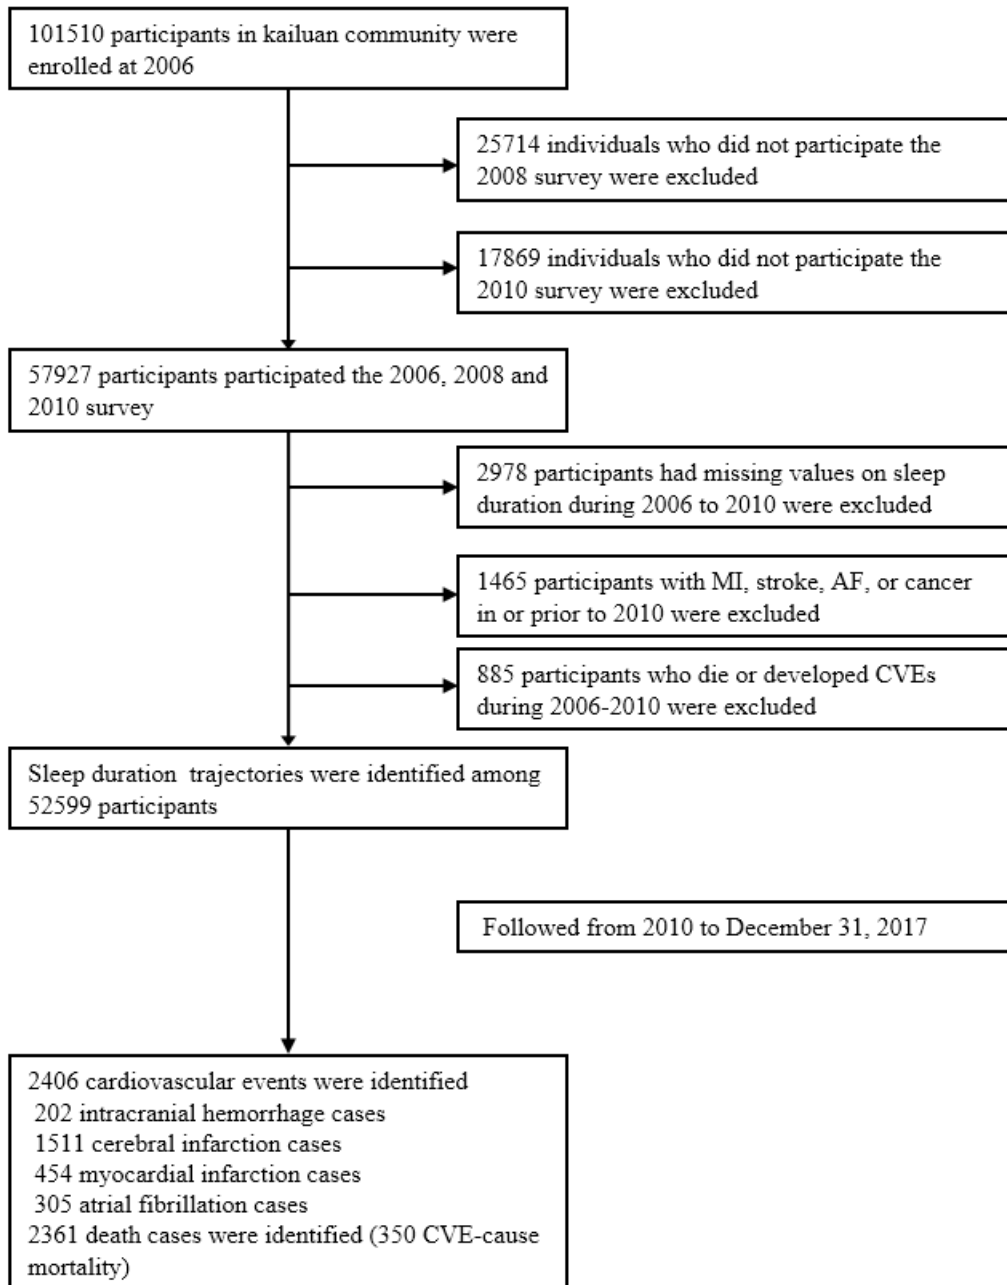

**eFigure 2. Restricted Spline Curves for Associations Between Baseline (2010) Sleep Duration and All-Cause Mortality or Cardiovascular Events**

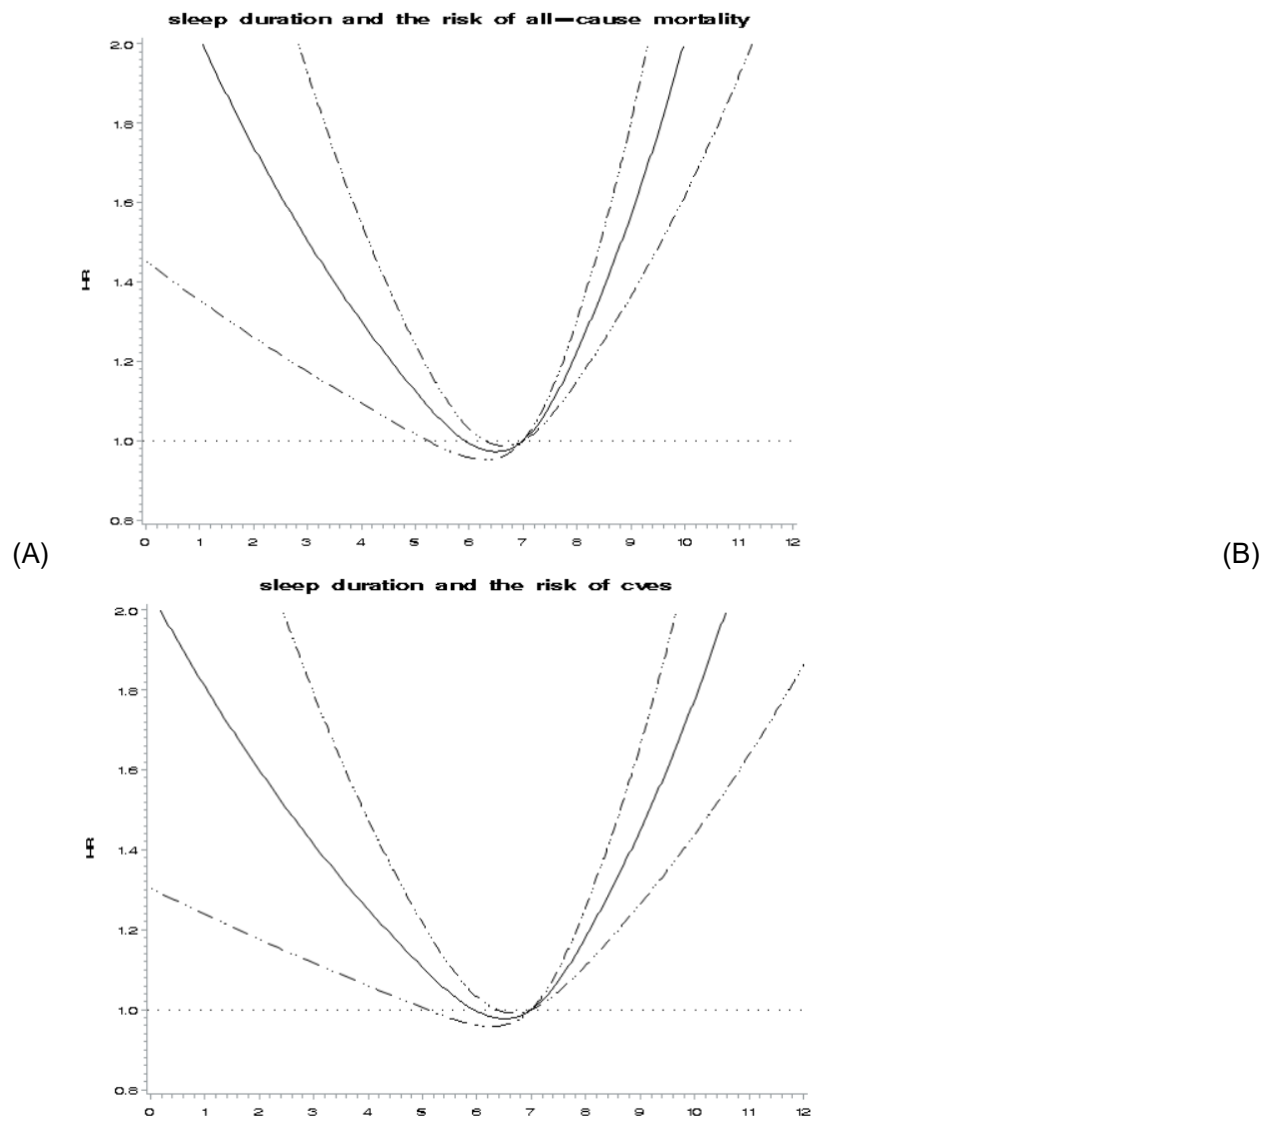

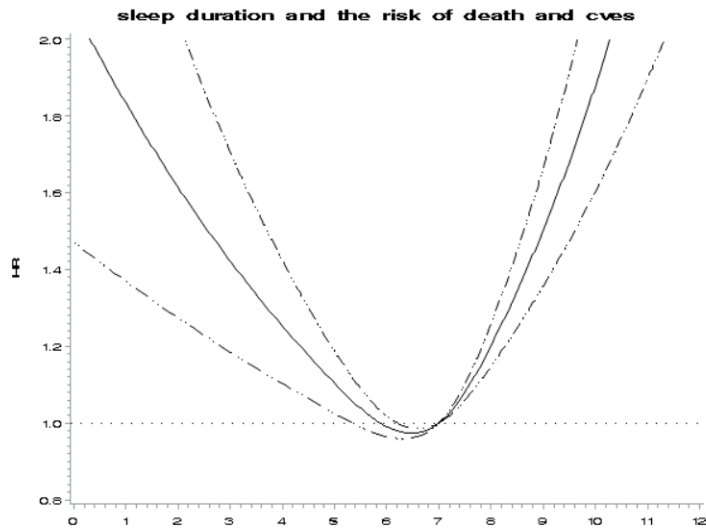

(C)

- (A) all-cause mortality; (B) cardiovascular events; (C) composite outcomes; Adjusted for adjusted for age, sex, marital status, occupation, average income, education, physical activity, smoking status, drinking status, salt intake, family history of stroke, family history of MI, hypertension, hyperlipidemia, diabetes, snoring frequency, antihypertensive use, hypoglycemic use, lipid lowering agents use, BMI, fasting blood glucose, hs-CRP, SBP, DBP, eGFR.

**eTable 1. Association Between Sleep Duration Trajectory Groups and First Cardiovascular Events, Stratified by Age, Sex, BMI, Hypertension, Diabetes, Hyperlipidemia, and Kidney Function**

|                                              | Sleep duration trajectory group, HR (95% CI) |                         |                         |                         | P for interaction |
|----------------------------------------------|----------------------------------------------|-------------------------|-------------------------|-------------------------|-------------------|
|                                              | Normal-Stable                                | Normal-Decreasing       | low-Increasing          | low-Stable              |                   |
| <b>Age (years)</b>                           |                                              |                         |                         |                         |                   |
| <65 years (n=44766)                          |                                              |                         |                         |                         |                   |
| Incidence rate†                              | 1201/223292                                  | 253/43926               | 116/16993               | 35/4139                 | 0.13              |
| Fully adjusted model*                        | 1.00 (Ref)                                   | 1.13 (0.94-1.36)        | <b>1.28 (1.04-1.56)</b> | <b>1.75 (1.17-2.62)</b> |                   |
| ≥65 years (n=7833)                           |                                              |                         |                         |                         |                   |
| Incidence rate†                              | 592/32277                                    | 113/7346                | 81/4213                 | 15/1320                 | 0.78              |
| Fully adjusted model*                        | 1.00 (Ref)                                   | 1.14 (0.89-1.48)        | 1.15 (0.89-1.48)        | 1.12 (0.61-2.02)        |                   |
| <b>Sex</b>                                   |                                              |                         |                         |                         |                   |
| Male (n=40087)                               |                                              |                         |                         |                         |                   |
| Incidence rate†                              | 1576/192486                                  | 325/40265               | 169/17073               | 39/4032                 | 0.78              |
| Fully adjusted model*                        | 1.00 (Ref)                                   | 1.15 (0.97-1.35)        | <b>1.20 (1.01-1.42)</b> | 1.42 (0.98-2.06)        |                   |
| Female (n=12512)                             |                                              |                         |                         |                         |                   |
| Incidence rate†                              | 217/63087                                    | 41/11007                | 28/4134                 | 11/1427                 | 0.28              |
| Fully adjusted model*                        | 1.00 (Ref)                                   | 1.05 (0.66-1.67)        | 1.37 (0.89-2.09)        | 1.90 (0.86-4.18)        |                   |
| <b>BMI</b>                                   |                                              |                         |                         |                         |                   |
| <25 kg/m <sup>2</sup> (n=27346)              |                                              |                         |                         |                         |                   |
| Incidence rate†                              | 746/134087                                   | 167/26534               | 69/10607                | 23/2992                 | 0.28              |
| Fully adjusted model*                        | 1.00 (Ref)                                   | 1.14 (0.90-1.45)        | 1.02 (0.75-1.33)        | 1.27 (0.76-2.10)        |                   |
| ≥25 kg/m <sup>2</sup> (n=25253)              |                                              |                         |                         |                         |                   |
| Incidence rate†                              | 1047/121487                                  | 199/24737               | 128/10599               | 27/2467                 | 0.78              |
| Fully adjusted model*                        | 1.00 (Ref)                                   | 1.11 (0.90-1.36)        | <b>1.39 (1.14-1.69)</b> | <b>1.64 (1.05-2.56)</b> |                   |
| <b>Hypertension</b>                          |                                              |                         |                         |                         |                   |
| Yes (n=7790)                                 |                                              |                         |                         |                         |                   |
| Incidence rate†                              | 451/31573                                    | 132/10359               | 71/4121                 | 21/1496                 | 0.78              |
| Fully adjusted model*                        | 1.00 (Ref)                                   | 1.00 (0.77-1.31)        | 1.20 (0.91-1.57)        | 1.24 (0.73-2.09)        |                   |
| No (n=44775)                                 |                                              |                         |                         |                         |                   |
| Incidence rate†                              | 1342/223847                                  | 233/44138               | 126/17064               | 29/3957                 | 0.49              |
| Fully adjusted model*                        | 1.00 (Ref)                                   | 1.22 (1.00-1.48)        | <b>1.23 (1.01-1.50)</b> | <b>1.73 (1.12-2.68)</b> |                   |
| <b>Diabetes mellitus</b>                     |                                              |                         |                         |                         |                   |
| Yes (n=2256)                                 |                                              |                         |                         |                         |                   |
| Incidence rate†                              | 134/9102                                     | 40/2948                 | 15/1288                 | 10/420                  | 0.49              |
| Fully adjusted model*                        | 1.00 (Ref)                                   | 0.87 (0.60-1.26)        | 0.89 (0.52-1.53)        | 1.43 (0.71-2.85)        |                   |
| No (n=50336)                                 |                                              |                         |                         |                         |                   |
| Incidence rate†                              | 1659/246447                                  | 326/48309               | 182/20039               | 40/5039                 | 0.17              |
| Fully adjusted model*                        | 1.00 (Ref)                                   | 1.15 (0.97-1.35)        | <b>1.24 (1.05-1.47)</b> | 1.38 (0.96-1.98)        |                   |
| <b>Hyperlipidemia</b>                        |                                              |                         |                         |                         |                   |
| Yes (n=2862)                                 |                                              |                         |                         |                         |                   |
| Incidence rate†                              | 88/11824                                     | 45/4182                 | 17/1359                 | 8/566                   | 0.17              |
| Fully adjusted model*                        | 1.00 (Ref)                                   | <b>1.50 (1.04-2.17)</b> | 1.57 (0.92-2.70)        | 1.38 (0.62-3.05)        |                   |
| No (n=49736)                                 |                                              |                         |                         |                         |                   |
| Incidence rate                               | 1705/243743                                  | 321/47089               | 180/19847               | 42/4893                 | 0.61              |
| Fully adjusted model                         | 1.00 (Ref)                                   | 1.12 (0.95-1.32)        | <b>1.22 (1.03-1.44)</b> | <b>1.48 (1.04-2.12)</b> |                   |
| <b>Kidney function</b>                       |                                              |                         |                         |                         |                   |
| eGFR <60 mL/min/1.73m <sup>2</sup> (n=3314)  |                                              |                         |                         |                         |                   |
| Incidence rate†                              | 201/17114                                    | 24/1797                 | 19/1262                 | 2/211                   | 0.61              |
| Fully adjusted model*                        | 1.00 (Ref)                                   | 1.67 (0.82-3.42)        | 1.52 (0.91-2.54)        | 1.95 (0.40-9.48)        |                   |
| eGFR ≥60 mL/min/1.73m <sup>2</sup> (n=49285) |                                              |                         |                         |                         |                   |
| Incidence rate†                              | 1589/238460                                  | 342/49473               | 178/19944               | 48/5248                 | 0.61              |
| Fully adjusted model*                        | 1.00 (Ref)                                   | 1.09 (0.93-1.28)        | <b>1.20 (1.02-1.42)</b> | <b>1.42 (1.01-2.00)</b> |                   |

\*Adjusted for Age, sex, marital status (single, married, or divorced), occupation (Blue collar/white collar), average income (<500, 500-3,000, or ≥3,000 RMB/month), education (illiteracy or elementary, middle school, or college/university), physical activity (never, 1-2 times/week, or ≥3 times/week), smoking status (never, past, or current), drinking status (never, past, or current), salt intake (<6, 6-10, >10g/d), family history of stroke (yes/no), family history of MI (yes/no), hypertension (yes/no), hyperlipidemia (yes/no), diabetes (yes/no), snoring frequency (never/rare, occasionally, or frequently), sleep duration in 2010, antihypertensive use (yes/no), hypoglycemic use (yes/no), lipid lowering agents use (yes/no), BMI (<18.5, 18.5-25.0, 25.0-30.0, or ≥30.0 kg/m<sup>2</sup>), fasting blood glucose (<4.0, 4.0-5.60, 5.60-6.10, 6.10-7.0, or ≥7.0 mmol/L), hs-CRP (<1.0, 1.0-3.0, 3.0-10.0, or ≥10.0 mg/L), SBP (<120, 120-140, ≥140mmHg), DBP (<80, 80-90, ≥90mmHg), eGFR (<30, 30-60, 60-90, or ≥90 ml/min/1.73m<sup>2</sup>).

CI, confidence interval; CVEs, cardiovascular events; HR, hazard ratio.

†Per 10<sup>5</sup> person-years.

**eTable 2. Association Between Sleep Duration Trajectory Groups and All-Cause Mortality, Stratified by Age, Sex, BMI, Hypertension, Diabetes, Hyperlipidemia, and Kidney Function**

|                                              | Sleep duration trajectory group, HR (95% CI) |                         |                         |                          | P for interaction |  |
|----------------------------------------------|----------------------------------------------|-------------------------|-------------------------|--------------------------|-------------------|--|
|                                              | Normal-Stable                                | Normal-Decreasing       | low-Increasing          | low-Stable               |                   |  |
| <b>Age (years)</b>                           |                                              |                         |                         |                          |                   |  |
| <65 years (n=44766)                          |                                              |                         |                         |                          | 0.76              |  |
| Incidence rate†                              | 871/240683                                   | 182/47447               | 60/18439                | 15/4538                  |                   |  |
| Fully adjusted model*                        | 1.00 (Ref)                                   | <b>1.33 (1.07-1.66)</b> | 0.90 (0.68-1.19)        | 1.35 (0.77-2.38)         |                   |  |
| ≥65 years (n=7833)                           |                                              |                         |                         |                          |                   |  |
| Incidence rate†                              | 898/35895                                    | 198/8154                | 103/4742                | 34/1471                  |                   |  |
| Fully adjusted model*                        | 1.00 (Ref)                                   | <b>1.32 (1.05-1.65)</b> | 0.97 (0.78-1.21)        | <b>1.52 (1.00-2.34)</b>  |                   |  |
| <b>Sex</b>                                   |                                              |                         |                         |                          |                   |  |
| Male (n=40087)                               |                                              |                         |                         |                          |                   |  |
| Incidence rate†                              | 1592/208703                                  | 335/43721               | 148/18671               | 36/4428                  | 0.51              |  |
| Fully adjusted model*                        | 1.00 (Ref)                                   | <b>1.32 (1.12-1.56)</b> | 0.97 (0.81-1.16)        | 1.39 (0.95-2.03)         |                   |  |
| Female (n=12512)                             |                                              |                         |                         |                          |                   |  |
| Incidence rate†                              | 176/67875                                    | 45/11879                | 15/4510                 | 13/1580                  |                   |  |
| Fully adjusted model*                        | 1.00 (Ref)                                   | 1.48 (0.92-2.39)        | 0.78 (0.44-1.36)        | 2.10 (0.93-4.73)         |                   |  |
| <b>BMI</b>                                   |                                              |                         |                         |                          |                   |  |
| <25 kg/m <sup>2</sup> (n=27346)              |                                              |                         |                         |                          |                   |  |
| Incidence rate†                              | 898/144390                                   | 201/28663               | 88/11503                | 29/3276                  | 0.84              |  |
| Fully adjusted model*                        | 1.00 (Ref)                                   | <b>1.48 (1.19-1.84)</b> | 1.01 (0.80-1.28)        | <b>1.72 (1.10-2.69)</b>  |                   |  |
| ≥25 kg/m <sup>2</sup> (n=25253)              |                                              |                         |                         |                          |                   |  |
| Incidence rate†                              | 871/132188                                   | 179/26938               | 75/11678                | 20/2732                  |                   |  |
| Fully adjusted model*                        | 1.00 (Ref)                                   | 1.22 (0.97-1.53)        | 0.88 (0.68-1.13)        | 1.30 (0.77-2.19)         |                   |  |
| <b>Hypertension</b>                          |                                              |                         |                         |                          |                   |  |
| Yes (n=7790)                                 |                                              |                         |                         |                          |                   |  |
| Incidence rate†                              | 354/34847                                    | 114/11420               | 52/4590                 | 22/1663                  | 0.31              |  |
| Fully adjusted model*                        | 1.00 (Ref)                                   | 1.18 (0.88-1.58)        | 1.01 (0.73-1.38)        | 1.63 (0.94-2.82)         |                   |  |
| No (n=44775)                                 |                                              |                         |                         |                          |                   |  |
| Incidence rate†                              | 1415/241565                                  | 266/44138               | 111/18570               | 27/4339                  |                   |  |
| Fully adjusted model*                        | 1.00 (Ref)                                   | <b>1.44 (1.20-1.73)</b> | 0.93 (0.76-1.14)        | 1.41 (0.91-2.19)         |                   |  |
| <b>Diabetes mellitus</b>                     |                                              |                         |                         |                          |                   |  |
| Yes (n=2256)                                 |                                              |                         |                         |                          |                   |  |
| Incidence rate†                              | 148/10021                                    | 52/3234                 | 15/1288                 | 10/474                   | 0.64              |  |
| Fully adjusted model*                        | 1.00 (Ref)                                   | 1.24 (0.76-2.01)        | 0.63 (0.61-1.25)        | 2.32 (0.96-5.58)         |                   |  |
| No (n=50336)                                 |                                              |                         |                         |                          |                   |  |
| Incidence rate†                              | 1621/266528                                  | 328/52352               | 148/21887               | 39/5534                  |                   |  |
| Fully adjusted model*                        | 1.00 (Ref)                                   | <b>1.36 (1.16-1.61)</b> | 0.99 (0.83-1.19)        | 1.36 (0.94-1.98)         |                   |  |
| <b>Hyperlipidemia</b>                        |                                              |                         |                         |                          |                   |  |
| Yes (n=2862)                                 |                                              |                         |                         |                          |                   |  |
| Incidence rate†                              | 76/12883                                     | 36/4586                 | 4/1550                  | 7/632                    | 0.21              |  |
| Fully adjusted model*                        | 1.00 (Ref)                                   | 1.31 (0.73-2.32)        | 0.30 (0.09-0.97)        | 1.24 (0.42-3.71)         |                   |  |
| No (n=49736)                                 |                                              |                         |                         |                          |                   |  |
| Incidence rate                               | 1693/263687                                  | 344/51015               | 159/21681               | 42/5376                  |                   |  |
| Fully adjusted model                         | 1.00 (Ref)                                   | <b>1.34 (1.14-1.58)</b> | 0.99 (0.83-1.18)        | <b>1.50 (1.04-2.13)</b>  |                   |  |
| <b>Kidney function</b>                       |                                              |                         |                         |                          |                   |  |
| eGFR <60 mL/min/1.73m <sup>2</sup> (n=3314)  |                                              |                         |                         |                          |                   |  |
| Incidence rate†                              | 306/18576                                    | 31/1963                 | 26/1385                 | 8/229                    | 0.24              |  |
| Fully adjusted model*                        | 1.00 (Ref)                                   | <b>1.94 (1.12-3.36)</b> | 1.15 (0.74-1.77)        | <b>4.17 (1.60-10.83)</b> |                   |  |
| eGFR ≥60 mL/min/1.73m <sup>2</sup> (n=49285) |                                              |                         |                         |                          |                   |  |
| Incidence rate†                              | 1589/238460                                  | 342/49473               | 178/19944               | 48/5248                  |                   |  |
| Fully adjusted model*                        | 1.00 (Ref)                                   | 1.09 (0.93-1.28)        | <b>1.20 (1.02-1.42)</b> | <b>1.42 (1.01-2.00)</b>  |                   |  |

\*Adjusted for Age, sex, marital status (single, married, or divorced), occupation (Blue collar/white collar), average income (<500, 500-3,000, or ≥3,000 RMB/month), education (illiteracy or elementary, middle school, or college/university), physical activity (never, 1-2 times/week, or ≥3 times/week), smoking status (never, past, or current), drinking status (never, past, or current), salt intake (<6, 6-10, >10g/d), family history of stroke (yes/no), family history of MI (yes/no), hypertension (yes/no), Hyperlipidemia (yes/no), diabetes (yes/no), snoring frequency (never/rare, occasionally, or frequently), sleep duration in 2010, antihypertensive use (yes/no), hypoglycemic use (yes/no), lipid lowering agents use (yes/no), BMI (<18.5, 18.5-25.0, 25.0-30.0, or ≥30.0 kg/m<sup>2</sup>), fasting blood glucose (<4.0, 4.0-5.60, 5.60-6.10, 6.10-7.0, or ≥7.0 mmol/L), hs-CRP (<1.0, 1.0-3.0, 3.0-10.0, or ≥10.0 mg/L), SBP (<120, 120-140, ≥140mmHg), DBP (<80, 80-90, ≥90mmHg), eGFR (<30, 30-60, 60-90, or ≥90 ml/min/1.73m<sup>2</sup>).

CI, confidence interval; CVEs, cardiovascular events; HR, hazard ratio.

†Per 10<sup>5</sup> person-years.

**eTable 3. Association of Baseline (2010) Sleep Duration and First Cardiovascular Events or All-Cause Mortality**

| Outcome                                   | Sleep duration in 2010, HR (95% CI) |                         |                 |                         |                         |
|-------------------------------------------|-------------------------------------|-------------------------|-----------------|-------------------------|-------------------------|
|                                           | <6h<br>n=4995                       | 6-7h<br>n=12275         | 7-8h<br>n=11218 | 8-9h<br>n=23320         | ≥9h<br>n=737            |
| <b>First CVEs and all-cause mortality</b> |                                     |                         |                 |                         |                         |
| Cases/person years                        | 477/34036                           | 927/83388               | 718/76349       | 2231/155982             | 65/4960                 |
| Incidence rate†                           | 1401.4                              | 1111.7                  | 940.4           | 1430.3                  | 1310.5                  |
| Age and sex adjusted                      | <b>1.27 (1.13-1.43)</b>             | 1.10 (0.99-1.21)        | 1.00 (Ref)      | <b>1.34 (1.23-1.46)</b> | <b>1.40 (1.08-1.80)</b> |
| Multivariable adjusted*                   | <b>1.24 (1.10-1.39)</b>             | 1.08 (0.98-1.20)        | 1.00 (Ref)      | <b>1.32 (1.21-1.44)</b> | <b>1.45 (1.13-1.87)</b> |
| <b>CVEs</b>                               |                                     |                         |                 |                         |                         |
| Cases/person years                        | 248/31685                           | 541/83471               | 404/76462       | 1182/156139             | 30/4976                 |
| Incidence rate†                           | 782.7                               | 648.1                   | 528.4           | 757.0                   | 602.9                   |
| Age and sex adjusted                      | <b>1.25 (1.07-1.47)</b>             | <b>1.17 (1.03-1.33)</b> | 1.00 (Ref)      | <b>1.33 (1.18-1.49)</b> | 1.17 (0.81-1.70)        |
| Multivariable adjusted*                   | <b>1.19 (1.01-1.40)</b>             | <b>1.15 (1.01-1.31)</b> | 1.00 (Ref)      | <b>1.30 (1.15-1.41)</b> | 1.17 (0.81-1.70)        |
| <b>All cause mortality</b>                |                                     |                         |                 |                         |                         |
| Cases/person years                        | 257/34377                           | 463/84959               | 377/77594       | 1224/159382             | 39/5054                 |
| Mortality rate†                           | 747.6                               | 545.0                   | 485.9           | 768.0                   | 771.7                   |
| Age and sex adjusted                      | <b>1.22 (1.04-1.43)</b>             | 1.00 (0.87-1.15)        | 1.00 (Ref)      | <b>1.30 (1.15-1.46)</b> | <b>1.53 (1.10-2.13)</b> |
| Multivariable adjusted*                   | <b>1.18 (1.01-1.38)</b>             | 1.00 (0.87-1.15)        | 1.00 (Ref)      | <b>1.25 (1.10-1.41)</b> | <b>1.52 (1.09-2.11)</b> |

\*Adjusted for Age, sex, marital status (single, married, or divorced), occupation (Blue collar/white collar), average income (<500, 500-3,000, or ≥3,000 RMB/month), education (illiteracy or elementary, middle school, or college/university), physical activity (never, 1-2 times/week, or ≥3 times/week), smoking status (never, past, or current), drinking status (never, past, or current), salt intake (<6, 6-10, >10g/d), family history of stroke (yes/no), family history of MI (yes/no), hypertension (yes/no), Hyperlipidemia (yes/no), diabetes (yes/no), snoring frequency (never/rare, occasionally, or frequently), sleep duration in 2010, antihypertensive use (yes/no), hypoglycemic use (yes/no), lipid lowering agents use (yes/no), BMI (<18.5, 18.5-25.0, 25.0-30.0, or ≥30.0 kg/m<sup>2</sup>), fasting blood glucose (<4.0, 4.0-5.60, 5.60-6.10, 6.10-7.0, or ≥7.0 mmol/L), hs-CRP (<1.0, 1.0-3.0, 3.0-10.0, or ≥10.0 mg/L), SBP (<120, 120-140, ≥140mmHg), DBP (<80, 80-90, ≥90mmHg), eGFR (<30, 30-60, 60-90, or ≥90 ml/min/1.73m<sup>2</sup>).

CI, confidence interval; CVEs, cardiovascular events; HR, hazard ratio.

†Per 10<sup>5</sup> person-years

**eTable 4. Association Between Cumulative Average Sleep Duration During 2006 to 2010 and First Cardiovascular Events or All-Cause Mortality**

| Outcome                                   | Average sleep duration during 2006-2010, HR (95% CI) |                  |                 |                         |                         |
|-------------------------------------------|------------------------------------------------------|------------------|-----------------|-------------------------|-------------------------|
|                                           | <6h<br>n=4018                                        | 6-7h<br>n=13205  | 7-8h<br>n=23793 | 8-9h<br>n=11393         | ≥9h<br>n=190            |
| <b>First CVEs and all-cause mortality</b> |                                                      |                  |                 |                         |                         |
| Cases/person years                        | 381/26907                                            | 1110/89243       | 1933/160645     | 968/76679               | 26/1244                 |
| Incidence rate†                           | 1416.0                                               | 1243.8           | 1203.3          | 1262.4                  | 2090.0                  |
| Age and sex adjusted                      | 1.02 (0.91-1.13)                                     | 0.98 (0.91-1.05) | 1.00 (Ref)      | 1.07 (0.99-1.16)        | <b>1.81 (1.23-2.67)</b> |
| Multivariable adjusted*                   | 0.99 (0.88-1.11)                                     | 0.98 (0.91-1.06) | 1.00 (Ref)      | 1.06 (0.98-1.15)        | <b>1.75 (1.19-2.58)</b> |
| <b>CVEs</b>                               |                                                      |                  |                 |                         |                         |
| Cases/person years                        | 209/25180                                            | 610/83799        | 1076/151163     | 501/72200               | 10/1168                 |
| Incidence rate†                           | 830.0                                                | 727.9            | 711.8           | 693.9                   | 856.2                   |
| Age and sex adjusted                      | 1.09 (0.94-1.26)                                     | 0.98 (0.89-1.09) | 1.00 (Ref)      | 1.02 (0.92-1.13)        | 1.08 (0.58-2.03)        |
| Multivariable adjusted*                   | 1.04 (0.89-1.21)                                     | 0.98 (0.88-1.08) | 1.00 (Ref)      | 1.02 (0.92-1.14)        | 1.10 (0.59-2.06)        |
| <b>All cause mortality</b>                |                                                      |                  |                 |                         |                         |
| Cases/person years                        | 202/27495                                            | 588/90951        | 1013/163602     | 540/78056               | 18/1264                 |
| Mortality rate†                           | 734.7                                                | 646.5            | 619.2           | 691.8                   | 1424.0                  |
| Age and sex adjusted                      | 0.97 (0.84-1.13)                                     | 0.98 (0.89-1.09) | 1.00 (Ref)      | <b>1.12 (1.01-1.25)</b> | <b>2.41 (1.51-3.84)</b> |
| Multivariable adjusted*                   | 0.98 (0.84-1.14)                                     | 0.99 (0.89-1.09) | 1.00 (Ref)      | <b>1.11 (1.00-1.23)</b> | <b>2.34 (1.46-3.72)</b> |

\*Adjusted for Age, sex, marital status (single, married, or divorced), occupation (Blue collar/white collar), average income (<500, 500-3,000, or ≥3,000 RMB/month), education (illiteracy or elementary, middle school, or college/university), physical activity (never, 1-2 times/week, or ≥3 times/week), smoking status (never, past, or current), drinking status (never, past, or current), salt intake (<6, 6-10, >10g/d), family history of stroke (yes/no), family history of MI (yes/no), hypertension (yes/no), Hyperlipidemia (yes/no), diabetes (yes/no), snoring frequency (never/rare, occasionally, or frequently), sleep duration in 2010, antihypertensive use (yes/no), hypoglycemic use (yes/no), lipid lowering agents use (yes/no), BMI (<18.5, 18.5-25.0, 25.0-30.0, or ≥30.0 kg/m<sup>2</sup>), fasting blood glucose (<4.0, 4.0-5.60, 5.60-6.10, 6.10-7.0, or ≥7.0 mmol/L), hs-CRP (<1.0, 1.0-3.0, 3.0-10.0, or ≥10.0 mg/L), SBP (<120, 120-140, ≥140mmHg), DBP (<80, 80-90, ≥90mmHg), eGFR (<30, 30-60, 60-90, or ≥90 ml/min/1.73m<sup>2</sup>).

CI, confidence interval; CVEs, cardiovascular events; HR, hazard ratio.

†Per 10<sup>5</sup> person-years.
